# Supplementary material for: Wrapping single-walled carbon nanotubes with long single-stranded DNA molecules produced by rolling circle amplification
Source: Royal Society of Chemistry journal article supplement (doi:10.1039/b606518j), 2006-01-01
Supplement: b606518j.pdf [file b606518j.pdf]

## Electronic Supplementary Information

### Wrapping Single-Walled Carbon Nanotubes with Long Single-Stranded DNA Molecules Produced by Rolling Circle Amplification

Weian Zhao, Yan Gao, Michael A. Brook,\* and Yingfu Li\*

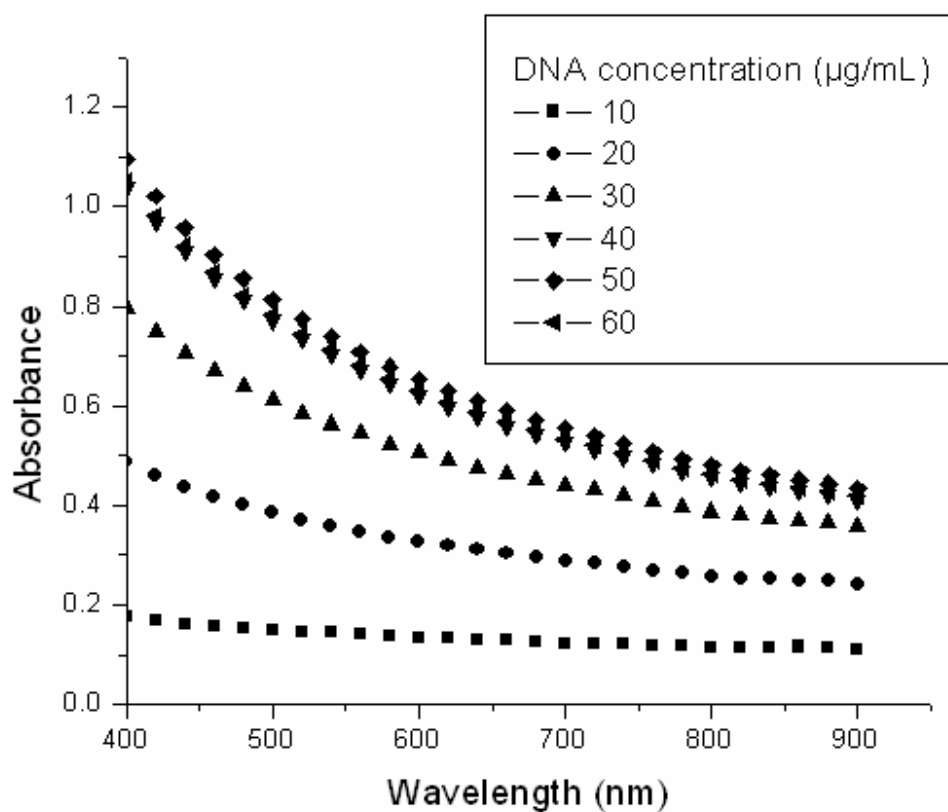

Fig S1. Representative UV-Vis absorption spectra of ssDNA-wrapped SWNT solutions. SWNT concentration in these experiments were 0.6 mg/mL.
